# Supplementary material
Source: publisher figshare collection journal article supplement (https://karger.figshare.com/articles/dataset/_/4929530)
Supplement: Supplementary file 1 [file 1]

Archive with 4 entries (4 files):
- 460296_sm1.pdf
- 450296_sm2.pdf
- 460296_sm3.pdf
- 460296_sm4.pdf
