# Supplementary material
Source: publisher figshare collection journal article supplement (https://karger.figshare.com/articles/dataset/_/4929530)
Supplement: Supplementary file 1 [file 1 › 450296_sm2.pdf]

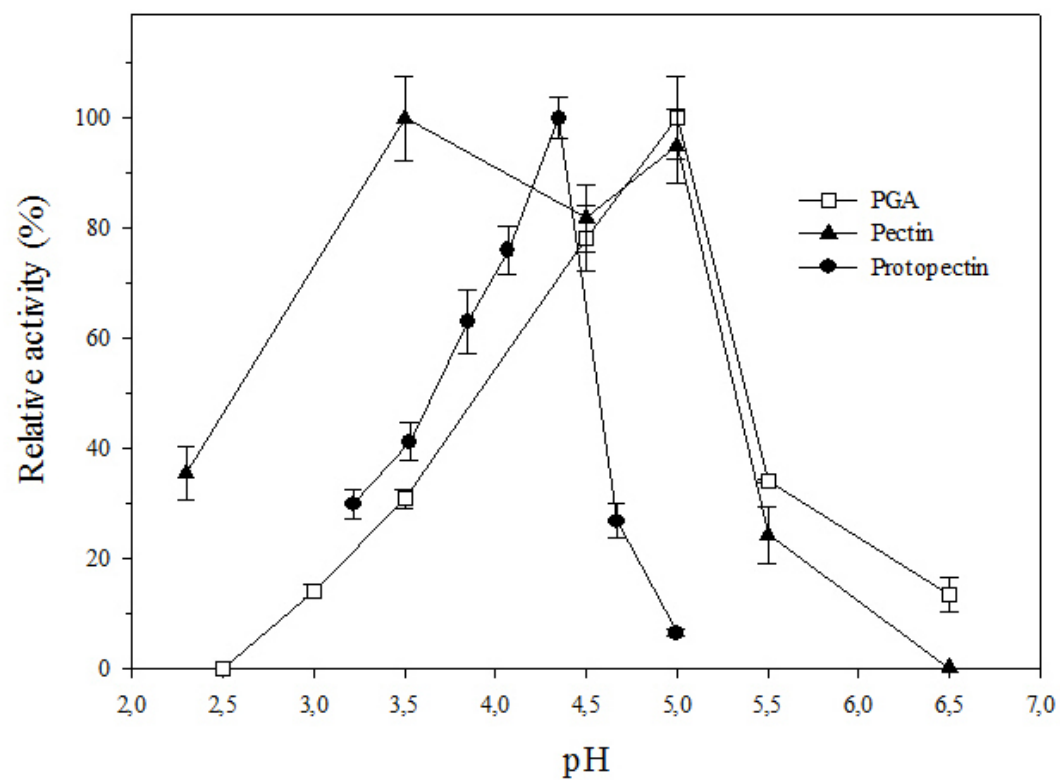

**Fig. S2.** Influence of pH on *A. sojae* PG activity towards PGA, pectin and protopectin. Error bars represent standard deviation of the mean, calculated for three replicates.
