# Supplementary material
Source: publisher figshare collection journal article supplement (https://karger.figshare.com/articles/dataset/_/4929530)
Supplement: Supplementary file 1 [file 1 › 460296_sm1.pdf]

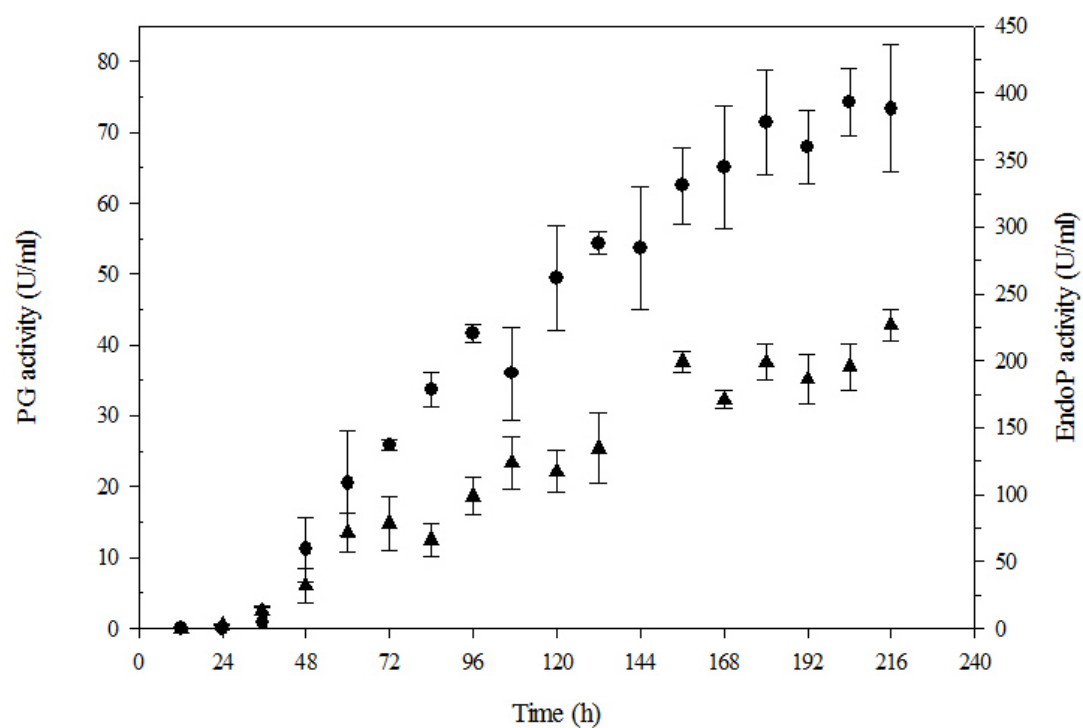

**Fig. S1.** Production profile of PG (●) and endoP (▲) activities by *A. sojae* growing on a culture medium with orange peel and ammonium sulphate. Error bars represent standard deviation calculated on three culture replicates.
