# Supplementary material
Source: publisher figshare collection journal article supplement (https://karger.figshare.com/articles/dataset/_/4929530)
Supplement: Supplementary file 1 [file 1 › 460296_sm3.pdf]

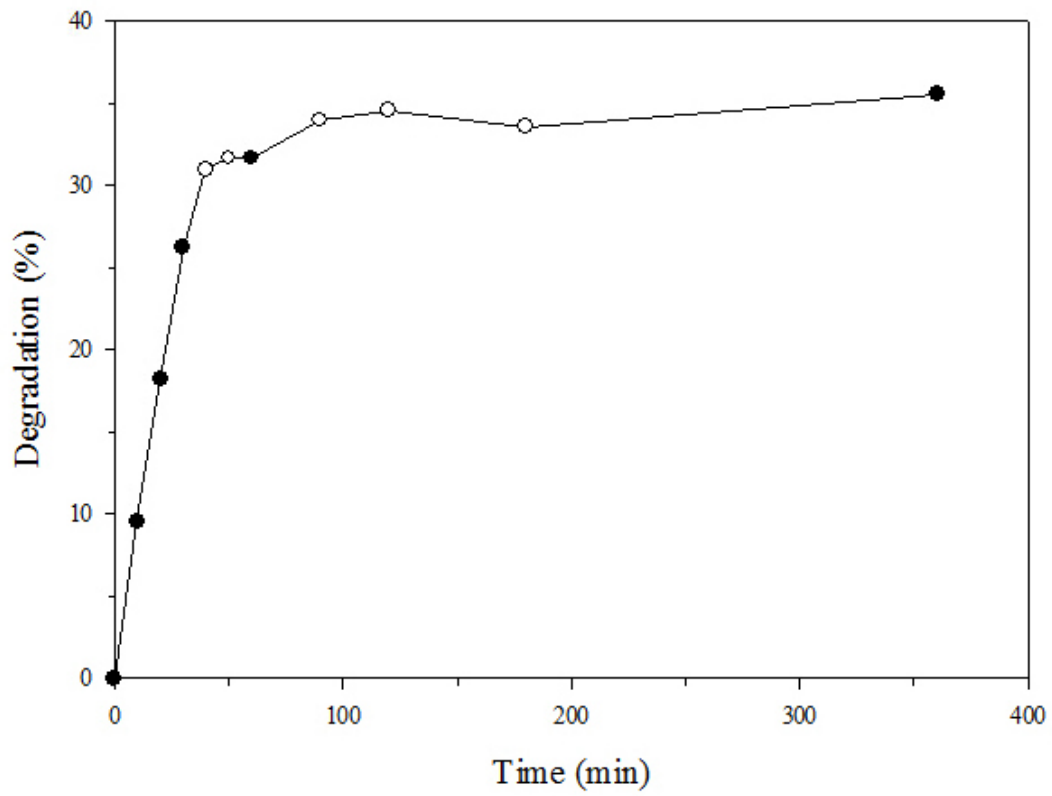

**Fig. S3.** Time-course of hydrolysis of PGA with *A. sojae* polygalacturonase. Black dots indicate samples subjected to TLC analysis. The percent degradation to GALA for each sample was calculated from the following equation:

$$\% \text{ degradation} = \frac{(\mu\text{moles/ml})_{\text{GALA}} \cdot (\text{MW})_{\text{PGAsubunit}} \cdot 100}{(\mu\text{g/ml})_{\text{PGA}}}$$
