# Supplementary material
Source: publisher figshare collection journal article supplement (https://karger.figshare.com/articles/dataset/_/4929530)
Supplement: Supplementary file 1 [file 1 › 460296_sm4.pdf]

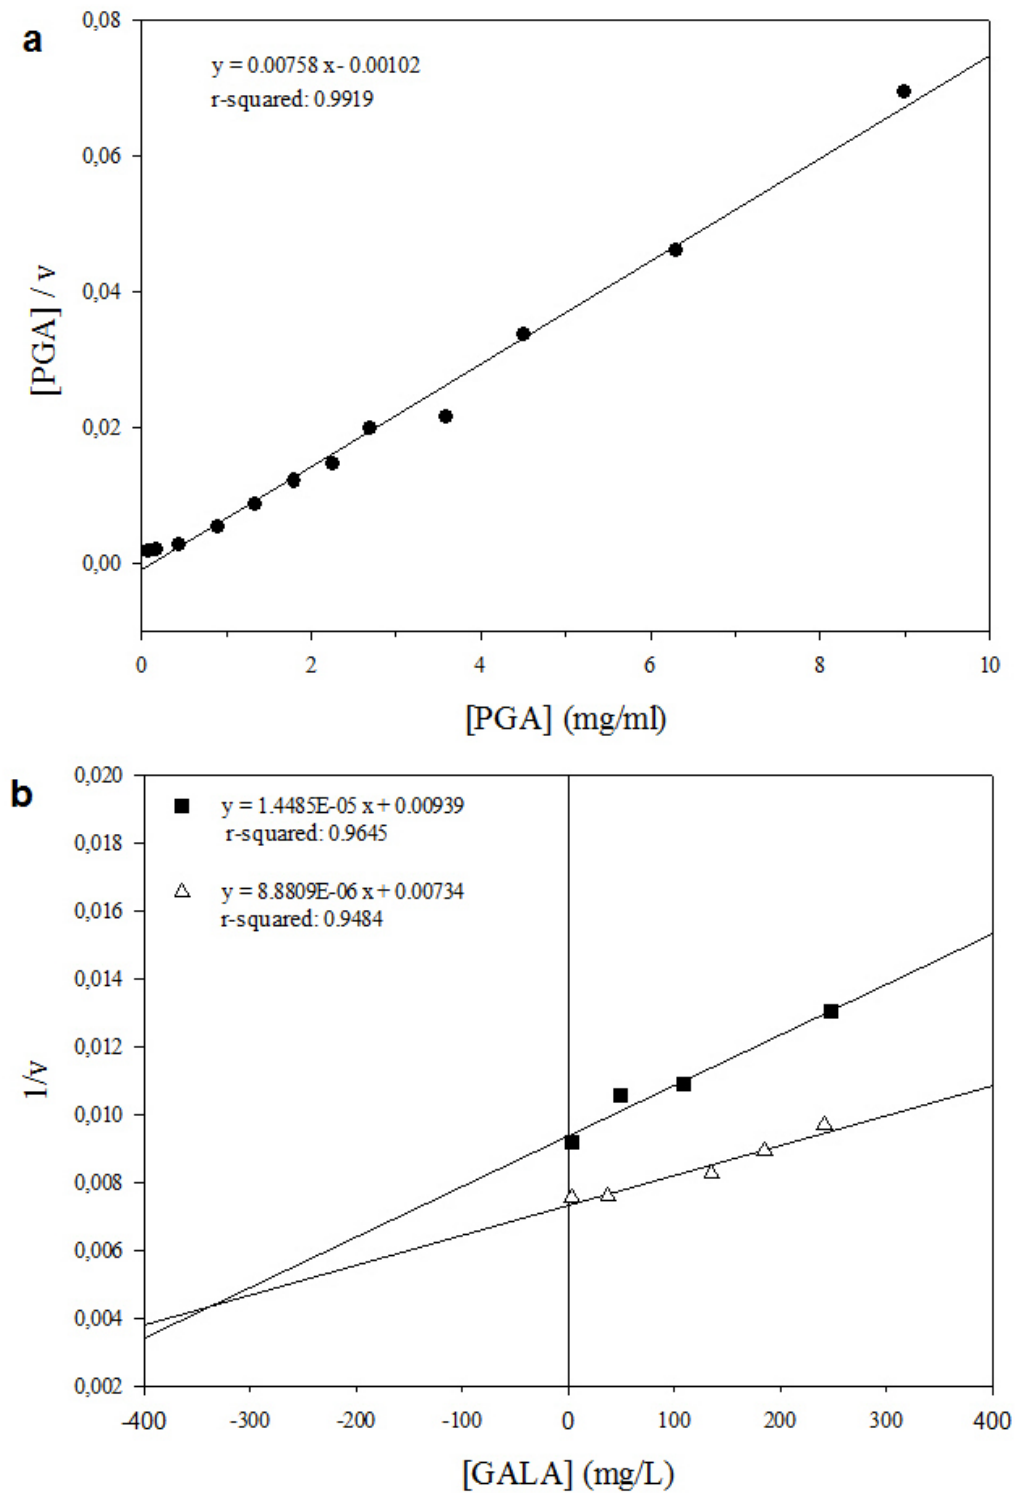

**Fig. S4.** (a) Hanes-Hultin plot used to determine the  $V_{MAX}$  and  $K_M$  values for PGA. (b) Dixon plot used to calculate the inhibition constant,  $K_i$ , for the enzymatic end-products of PGA hydrolysis. Two different substrate concentrations were employed in this assay : (■) 0.375 and (△) 0.4375 mg/ml ; for each one, PG activity was measured in the presence of increasing amounts of end-products, expressed as [GALA].
